# Supplementary material for: Differential Expression of HERV-W in Peripheral Blood in Multiple Sclerosis and Healthy Patients in Two Different Ethnic Groups
Source: Front Pharmacol. 2020 Jan 30;10:1645. doi: 10.3389/fphar.2019.01645 (PMC7002920; doi:10.3389/fphar.2019.01645)
Supplement: Supplementary file 1 [file DataSheet_1.xlsx]

## Sheet: Sheet1
Location	AGE	GENDER	CLINICAL STAGE	Ethnicity	Current Therapy
UK	32	M	HC	White			UK= United Kingdom
UK	44	F	HC	White			Russ= Russian
UK	47	F	HC	White			HC= Healthy control
UK	38	F	HC	White			RR= Relapsing remitting MS
UK	27	M	HC	White			SP= secondary progressive MS
UK	54	M	HC	White			PP= primary progressive MS
UK	31	F	HC	Arabic			RIS= Radiologically isolated syndrome
UK	30	M	HC	White
UK	42	M	HC	White
UK	27	M	HC	White			Note ethnicity is self reporting, "white" in the british cohort is likely to be "white british" while "white" in the Russian cohort is likely to be Russian
UK	44	M	HC
UK	60	F	HC	White
UK	44	F	HC	White
UK	55	F	HC	White
UK	28	M	HC	White
UK	60	M	HC	White
UK	53	F	HC	White
UK	59		HC	White
UK	31	M	HC	South Asian
UK	44	F	HC	White
UK	41	F	RR	White	None	Remission
UK	56	F		White	None	Remission
UK	38	F	RR	White	None	Remission
UK	54	M	RR	White	None	Remission
UK	55	F	SP		None	Remission
UK	46	F	SP		None	Remission
UK	44	F	RR		None	Remission
UK	46	F	RR		None	Remission
UK	52	F	SP		None	Remission
UK	21	M	RR		None	Remission
UK	61	F	SP		None	Remission
UK	46	F	SP		None	Remission
UK	51	F	RR	White	None	Remission
UK	56	F	PP	White	None	Remission
UK	56	F			None	Remission
UK	52	F	SP	White	None	Remission
UK	46	F		White	None	Remission
UK	48	F		White	None	Remission
UK	49	M	RR	White	Beta interferon	Remission
UK	45	F	RR	White	None	Remission
UK	41	F		White	None	Remission
UK	42	M	RR	White	Beta interferon	Remission
RUS	33	F	RR	White	First presentation	Remission
RUS	35	F	RR	White	First presentation	Relapse
RUS	35	M	RR	White	First presentation	Relapse
RUS	36	F	RR	White	First presentation	Remission
RUS	24	F	RR	White	First presentation	Relapse
RUS	33	F	RIS	White	First presentation	Remission
RUS	44	M	RR	White	First presentation	Remission
RUS	34	F	RR	White	Beta interferon	Remission
RUS	37	M	RR	White	Beta interferon	Remission
RUS	30	F	RR	White	Beta interferon	Remission
RUS	24	F	RR	White	Beta interferon	Remission
RUS	33	M	RR	White	Glatiramer acetate	Remission
RUS	29	F	RR	White	Beta interferon	Remission
RUS	30	F	RR	White	None	Relapse
RUS	31	F	RR	White	None	Remission
RUS	33	M	RR	White	Beta interferon	Remission
RUS	44	F	RR	White	None	Remission
RUS	28	F	HC
RUS	28	F	HC
RUS	22	M	HC
RUS	21	M	HC
RUS	28	F	HC
RUS	53	M	HC
RUS			HC
